# Supplementary material
Source: Springer Nature journal article supplement (https://www.springermedizin.de/resource/supplementary/13024_2008_57_MOESM9_ESM.pdf/9643286)
Supplement: MOESM9 [file 9643286]

**PRIMARY**

| <b>CAT. #</b> | <b>BIOCHEMICAL ASSAY</b>                                             | <b>SPECIES</b> | <b>CONC.</b> | <b>% INH.</b> |
|---------------|----------------------------------------------------------------------|----------------|--------------|---------------|
| 118070        | CYP450, 2C19                                                         | hum            | 10 $\mu$ M   | 55            |
| 203100        | Adrenergic $\alpha_{1A}$                                             | rat            | 10 $\mu$ M   | 96            |
| 203200        | Adrenergic $\alpha_{1B}$                                             | rat            | 10 $\mu$ M   | 100           |
| 203400        | Adrenergic $\alpha_{1D}$                                             | hum            | 10 $\mu$ M   | 95            |
| 203620        | Adrenergic $\alpha_{2A}$                                             | hum            | 10 $\mu$ M   | 97            |
| 214510        | Calcium Channel L-Type,<br>Benzothiazepine                           | rat            | 10 $\mu$ M   | 52            |
| 219500        | Dopamine D <sub>1</sub>                                              | hum            | 10 $\mu$ M   | 70            |
| 219700        | Dopamine D <sub>2S</sub>                                             | hum            | 10 $\mu$ M   | 83            |
| 219800        | Dopamine D <sub>3</sub>                                              | hum            | 10 $\mu$ M   | 73            |
| 219900        | Dopamine D <sub>4,2</sub>                                            | hum            | 10 $\mu$ M   | 52            |
| 239610        | Histamine H <sub>1</sub>                                             | hum            | 10 $\mu$ M   | 101           |
| 239710        | Histamine H <sub>2</sub>                                             | hum            | 10 $\mu$ M   | 96            |
| 241000        | Imidazoline I <sub>2</sub> , Central                                 | rat            | 10 $\mu$ M   | 89            |
| 271000        | Serotonin (5-Hydroxytryptamine) 5-HT <sub>1</sub> ,<br>Non-Selective | rat            | 10 $\mu$ M   | 63            |
| 271600        | Serotonin (5-Hydroxytryptamine) 5-HT <sub>2</sub> ,<br>Non-Selective | rat            | 10 $\mu$ M   | 83            |
| 271700        | Serotonin (5-Hydroxytryptamine) 5-<br>HT <sub>2B</sub>               | hum            | 10 $\mu$ M   | 74            |
| 271800        | Serotonin (5-Hydroxytryptamine) 5-<br>HT <sub>2C</sub>               | hum            | 10 $\mu$ M   | 95            |
| 272100        | Serotonin (5-Hydroxytryptamine) 5-HT <sub>5A</sub>                   | hum            | 10 $\mu$ M   | 99            |
| 272200        | Serotonin (5-Hydroxytryptamine) 5-HT <sub>6</sub>                    | hum            | 10 $\mu$ M   | 101           |
